# Supplementary material for: Urine tumor DNA detection of minimal residual disease in muscle-invasive bladder cancer treated with curative-intent radical cystectomy: A cohort study
Source: PLoS Med. 2021 Aug 31;18(8):e1003732. doi: 10.1371/journal.pmed.1003732 (PMC8407541; doi:10.1371/journal.pmed.1003732)
Supplement: S6 Table — (XLSX) [file pmed.1003732.s014.xlsx]

## Sheet: Sheet1
	S6 Table. Tumor tissue and germline DNA sequencing metrics.
	ID	Patient or Healthy Donor	Sample sourcea	NGS readsb	On-target ratec	Median depthd	Median unique depthe	Median fragment length (bp)f
	66	Healthy	Germline	62696195	0.664233	11183	716	254
	67	Healthy	Germline	66518226	0.600793	10881	781	242
	69	Healthy	Germline	60441652	0.652981	10727	981	271
	70	Healthy	Germline	68463451	0.638392	11973	972	282
	71	Healthy	Germline	47987510	0.659795	8623	805	250
	72	Healthy	Germline	59469829	0.482798	7732	825	266
	75	Healthy	Germline	52901050	0.648509	9222	830	274
	89	Healthy	Germline	52751977	0.632318	9005	680	241
	92	Healthy	Germline	49134879	0.646099	8593	879	269
	94	Healthy	Germline	62744190	0.648927	11067	1060	285
	95	Healthy	Germline	61708508	0.649134	10923	992	281
	98	Healthy	Germline	54483951	0.642955	9387	929	275
	104	Healthy	Germline	59470059	0.645628	10416	859	288
	106	Healthy	Germline	50618155	0.642885	8808	888	280
	130	Healthy	Germline	50390480	0.649689	8873	937	271
	BC-1045	Patient	Germline	80155852	0.519347	10648	656	307
	BC-1050	Patient	Germline	47732586	0.287874	3761	491	275
	BC-1058	Patient	Germline	88216385	0.520931	11694	657	290
	BC-1062	Patient	Germline	63855878	0.220118	3728	1028	238
	BC-1063	Patient	Germline	82548202	0.503266	10587	621	258
	BC-1064	Patient	Germline	45976357	0.275795	3498	394	246
	BC-1065	Patient	Germline	58252751	0.201268	3213	880	256
	BC-1069	Patient	Germline	53840485	0.26587	491	1064	247
	BC-1071	Patient	Tumor	87012882	0.63	14637.5	1917	270
	BC-1071	Patient	Germline	41983397	0.313722	3668	446	251
	BC-1076	Patient	Germline	47472877	0.333831	4309	535	271
	BC-1077	Patient	Germline	80035043	0.485255	10034	537	266
	BC-1083	Patient	Germline	50816662	0.31655	4372	531	261
	BC-1085	Patient	Tumor	62351046	0.630319	9753	777	225
	BC-1085	Patient	Germline	53321221	0.289044	4277	485	260
	BC-1088	Patient	Tumor	109837879	0.661763	18822	2069.5	259
	BC-1088	Patient	Germline	79618718	0.528935	11918	1017	239
	BC-1090	Patient	Germline	49898037	0.275872	3790	432	242
	BC-1096	Patient	Germline	54165553	0.268172	3947	393	225
	BC-1104	Patient	Germline	66777514	0.530978	10097	964	235
	BC-1105	Patient	Germline	74350224	0.499312	9582	530	258
	BC-1108	Patient	Germline	55329481	0.232126	3494	389	239
	BC-1109	Patient	Germline	54869415	0.270874	3994	389	220
	BC-1111	Patient	Germline	81563526	0.41624	9332	779	230
	BC-1116	Patient	Germline	52360249	0.2691	3880	412	254
	BC-1132	Patient	Germline	47569564	0.275119	3589	379	250
	BC-1133	Patient	Germline	96716658	0.436026	11832	1084	253
	BC-1135	Patient	Germline	113353007	0.554075	15796	619	277
	BC-1140	Patient	Germline	82737421	0.493591	11494	965	247
	BC-1147	Patient	Germline	63991557	0.512032	9142	918	235
	BC-1171	Patient	Germline	88816352	0.506603	11254	668	273
	BC-1174	Patient	Germline	83408547	0.613967	14788	1293	233
	BC-1182	Patient	Germline	87683304	0.518137	11625	580	237
	BC-1185	Patient	Germline	58405670	0.523491	7588	307	222
	BC-1186	Patient	Tumor	45069412	0.751992	660	75	258
	BC-1186	Patient	Germline	102822647	0.507169	13135	746	257
	BC-1188	Patient	Germline	83633874	0.487924	11425	970	252
	BC-1196	Patient	Germline	46315525	0.504003	6423	824	300
	BC-1197	Patient	Germline	40067620	0.487941	5295	614	253
	BC-1198	Patient	Germline	43909892	0.514059	6140	789	281
	BC-1202	Patient	Germline	43618303	0.527461	6307	793	262
	BC-1203	Patient	Germline	48289424	0.382004	5052	657	242
	BC-1205	Patient	Germline	49776300	0.517622	7073	991	260
	BC-1206	Patient	Tumor	138201355	0.749417	19503	2580	273
	BC-1206	Patient	Germline	47031765	0.504625	6462	728	228
	BC-1207	Patient	Germline	56854882	0.428921	6667	896	260
	BC-1209	Patient	Germline	66631578	0.417505	7627	1207	268
	aGermline DNA was from plasma-depleted whole blood, while tumor DNA was from tumor tissue collected prior to any systemic therapy (see Methods: Biological Specimen Collection and Processing).
	bNumber of total sequencing reads per sample after demultiplexing (see Methods: DNA Library Construction and Sequencing).
	cPercentage of quality-control-passed reads overlapping with the targeted hybrid-capture panel (see Methods: DNA Library Construction and Sequencing).
	dMedian non-deduplicated sequencing depth after CAPP-Seq (see Methods: DNA Library Construction and Sequencing).
	eMedian deduplicated sequencing depth after CAPP-Seq (see Methods: DNA Library Construction and Sequencing).
	fMedian length of sonicated DNA fragments, as determined by CAPP-Seq (see Methods: DNA Library Construction and Sequencing).
	bp = base pairs
	CAPP-Seq = Cancer Personalized Profiling by Deep Sequencing
	NGS = next-generation sequencing
