# Supplementary material for: Urine tumor DNA detection of minimal residual disease in muscle-invasive bladder cancer treated with curative-intent radical cystectomy: A cohort study
Source: PLoS Med. 2021 Aug 31;18(8):e1003732. doi: 10.1371/journal.pmed.1003732 (PMC8407541; doi:10.1371/journal.pmed.1003732)
Supplement: S10 Table — (XLSX) [file pmed.1003732.s018.xlsx]

## Sheet: Sheet1
	S10 Table. Multivariate logistic regression to predict the absence of pathologic complete response.
	Variable	Odds ratioa	p valuea
	utDNA MRDb (+/-)	54.1673	0.00291
	Age	1.00469	0.94477
	Smoking (yes/no)	0.206351	0.14094
	Urothelial (yes/no)	1.39458e-07	0.99652
	Sex (male/female)	1.02123	0.98643
	Stage T3 or higherc (yes/no)	0.571372	0.68819
	Ethnicity (white/non-white)	1.71887e-09	0.99548
	Neoadjuvant chemotherapy (yes/no)	3.64385	0.31375
	ap values and odds ratio were calculated after multivariate logistic regression to predict the lack of pathologic complete response in bladder cancer patients (see Methods: Power and Statistical Analyses)
	bUrine tumor DNA minimal residual disease detection status was determined as described in the Methods: Power and Statistical Analyses.
	cStaging was performed at the time of pre-treatment TURBT using AJCC 8 criteria.
	AJCC 8 = American Joint Committee on Cancer 8th edition
	MRD = minimal residual disease
	TURBT = transurethral resection of bladder tumor
	utDNA = urine tumor DNA
